# Supplementary material for: Photoinduced excitation and charge transfer processes of organic dyes with siloxane anchoring groups: a combined spectroscopic and computational study
Source: Royal Society of Chemistry journal article supplement (doi:10.1039/c7cp01956d), 2017-01-01
Supplement: c7cp01956d1.pdf [file c7cp01956d1.pdf]

## Photoinduced excitation and charge transfer processes of organic dyes with siloxane anchoring groups: a combined spectroscopic and computational study

### Supporting Information

#### Stationary absorption spectra of the remaining compounds

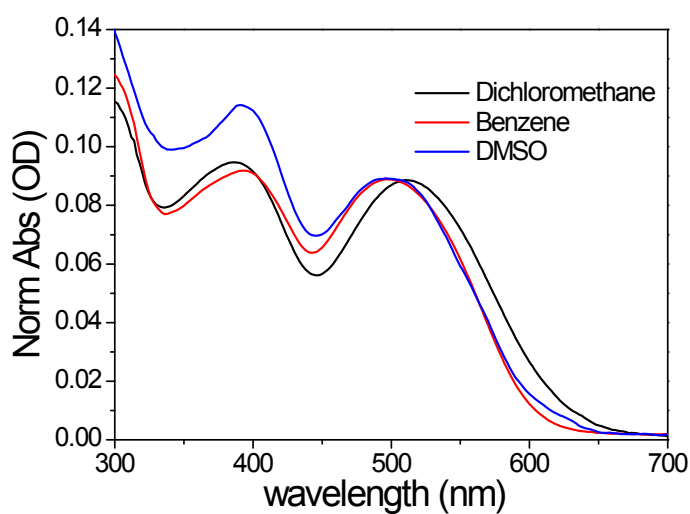

**Figure S1:** Absorption spectra of **MM62** in dichloromethane, acetonitrile and benzene

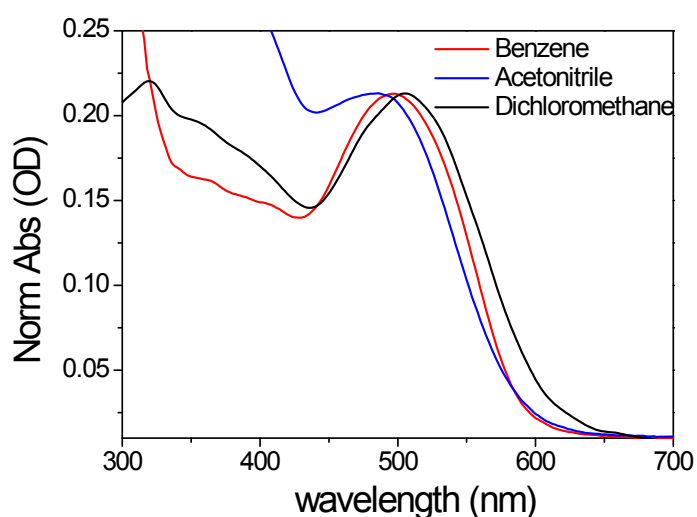

**Figure S2:** Absorption spectra of **MB56** in dichloromethane, acetonitrile and benzene

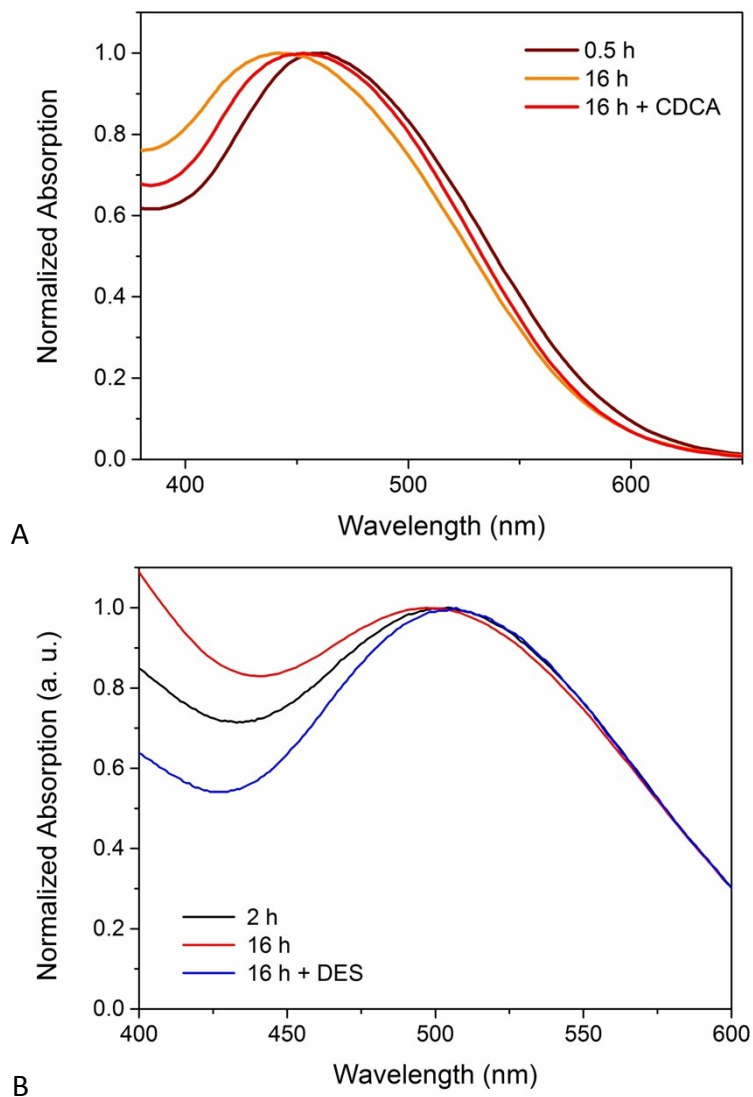

**Figure S3:** Effect of the staining time and of the addition of co-adsorbent on the absorption spectrum of dyes on a  $\text{TiO}_2$  film. Panel A) reports the normalized spectra of **DF15** in the presence of CDCA (chenodeoxycholic acid) and as a function of the staining time; Panel B) reports the normalized spectra of **MM62** in the presence of DES (dodecyltriethoxysilane) and as a function of the staining time.

## Fluorescence spectra

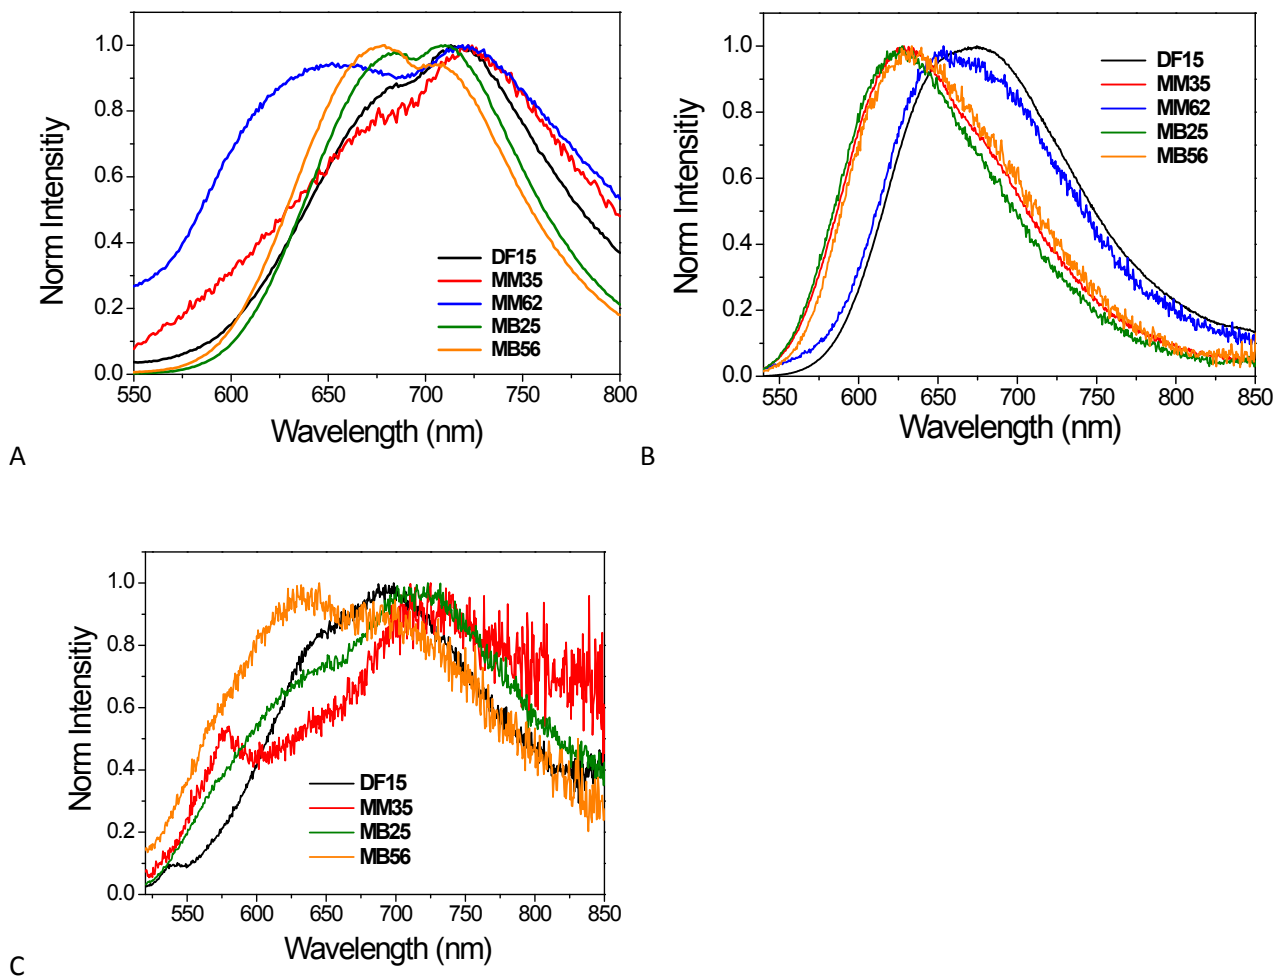

**Figure S4:** Normalized fluorescence spectra of all the analyzed dyes in A) dichloromethane; B) benzene; C) acetonitrile

## Additional Transient Absorption Measurements

### DF15 in different solvents

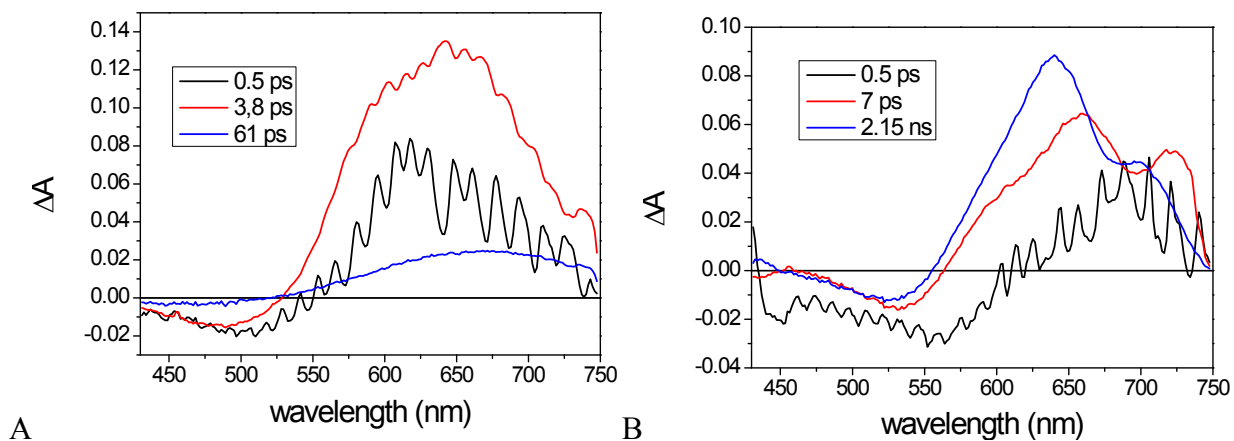

**Figure S5:** EADS obtained by the global analysis of transient data recorded for **DF15** in A) acetonitrile; B) benzene.

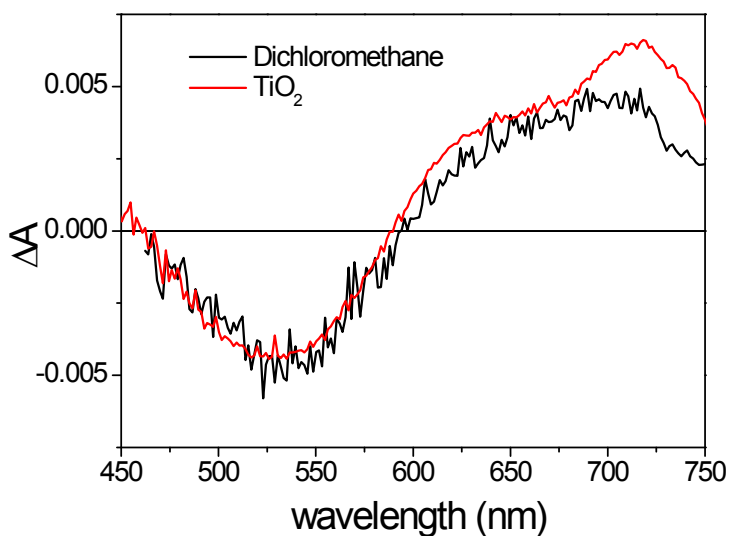

**Figure S6:** Comparison between the last EADS measured for **DF15** in dichloromethane and on the  $\text{TiO}_2$  surface.

## MM35 in different solvents

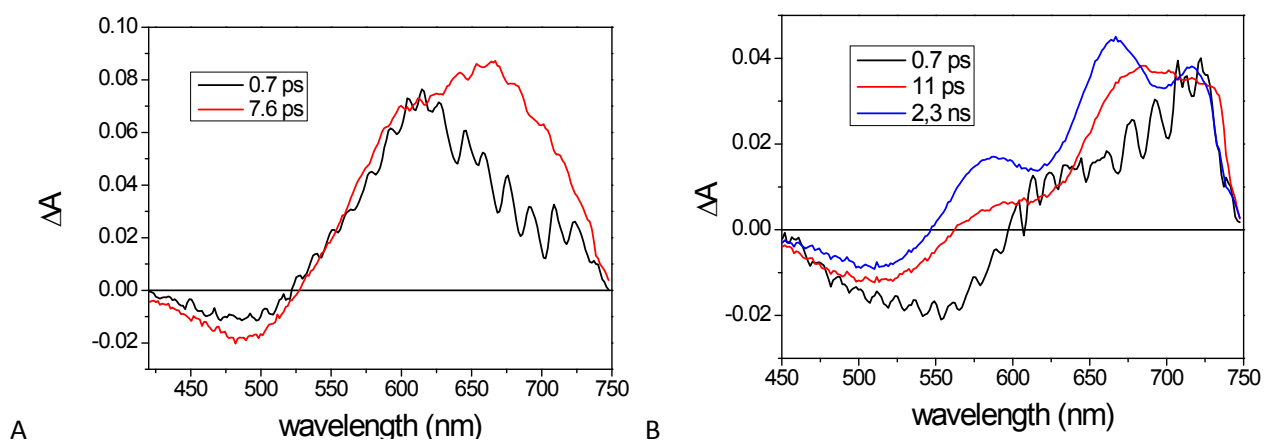

**Figure S7:** EADS obtained by the global analysis of transient data recorded for **MM35** in A) acetonitrile; B) benzene.

## MM62 in different solvents

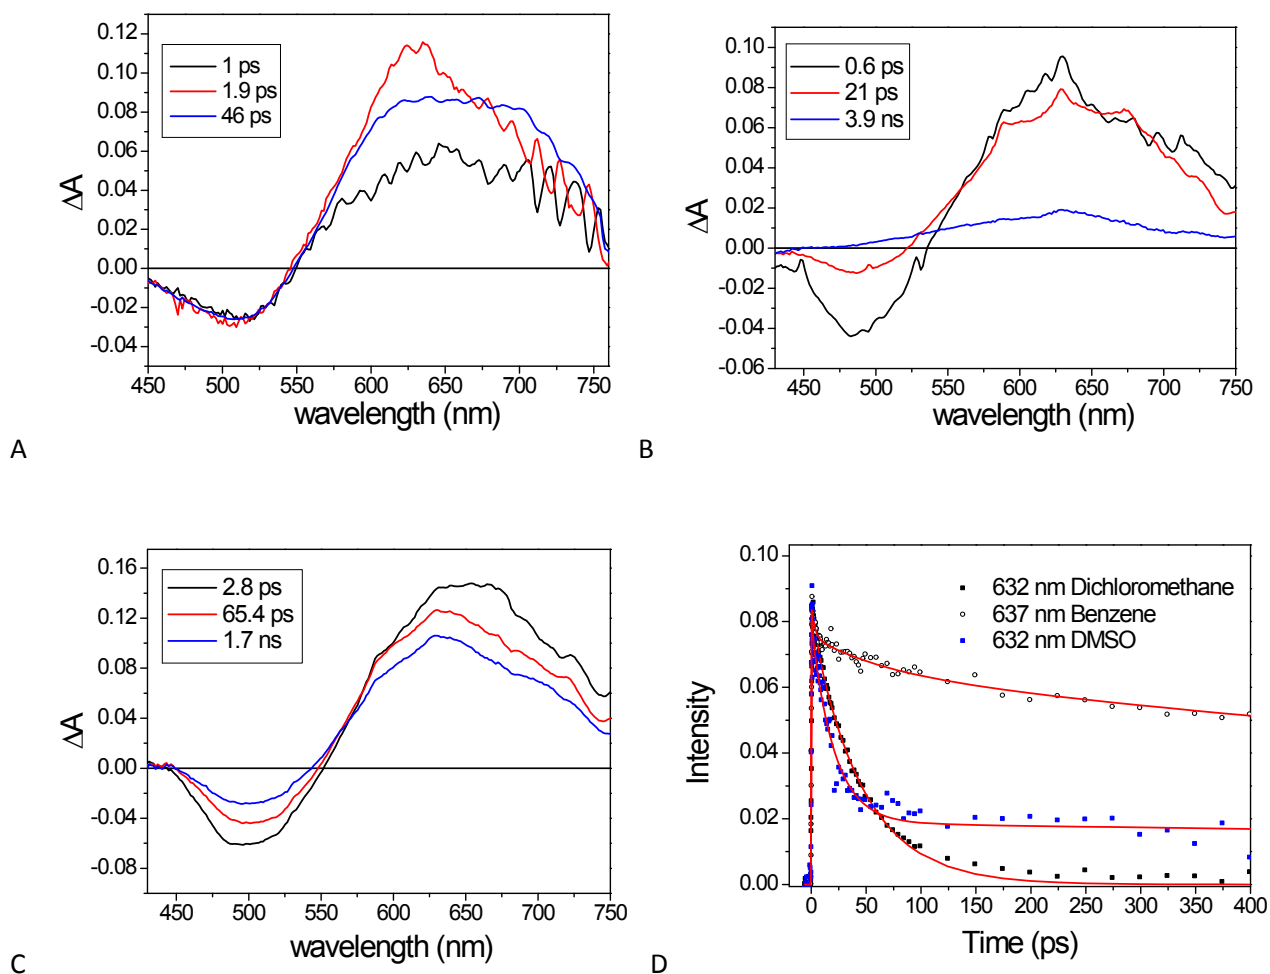

**Figure S8:** EADS obtained by the global analysis of transient data recorded for **MM62** in A) dichloromethane; B) DMSO; C) Benzene. DMSO was used as polar solvent in the case of **MM62** because of the very low solubility of the latter in acetonitrile. Panel D) reports the kinetic trace at 632-637 nm registered in the different solvents (scattered points) together with the fit resulting from global analysis (red line).

## MB25 in different solvents

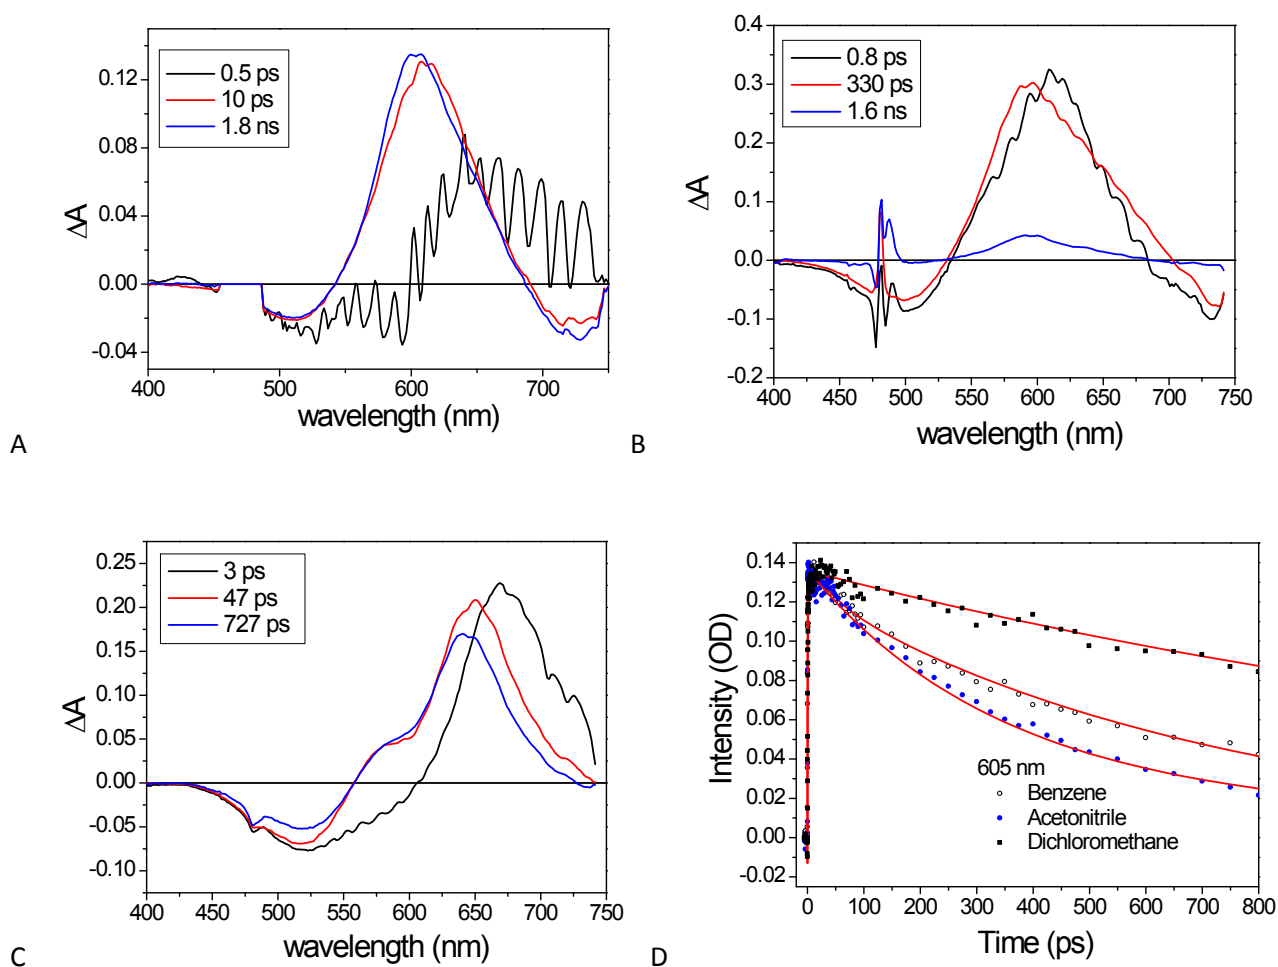

**Figure S9:** EADS obtained by the global analysis of transient data recorded for **MM25** in A) dichloromethane; B) acetonitrile; C) benzene. Panel D) reports the kinetic traces at 605 nm registered in the three solvents (scattered points) together with the fit resulting from global analysis (red line).

## MB56 in different solvents

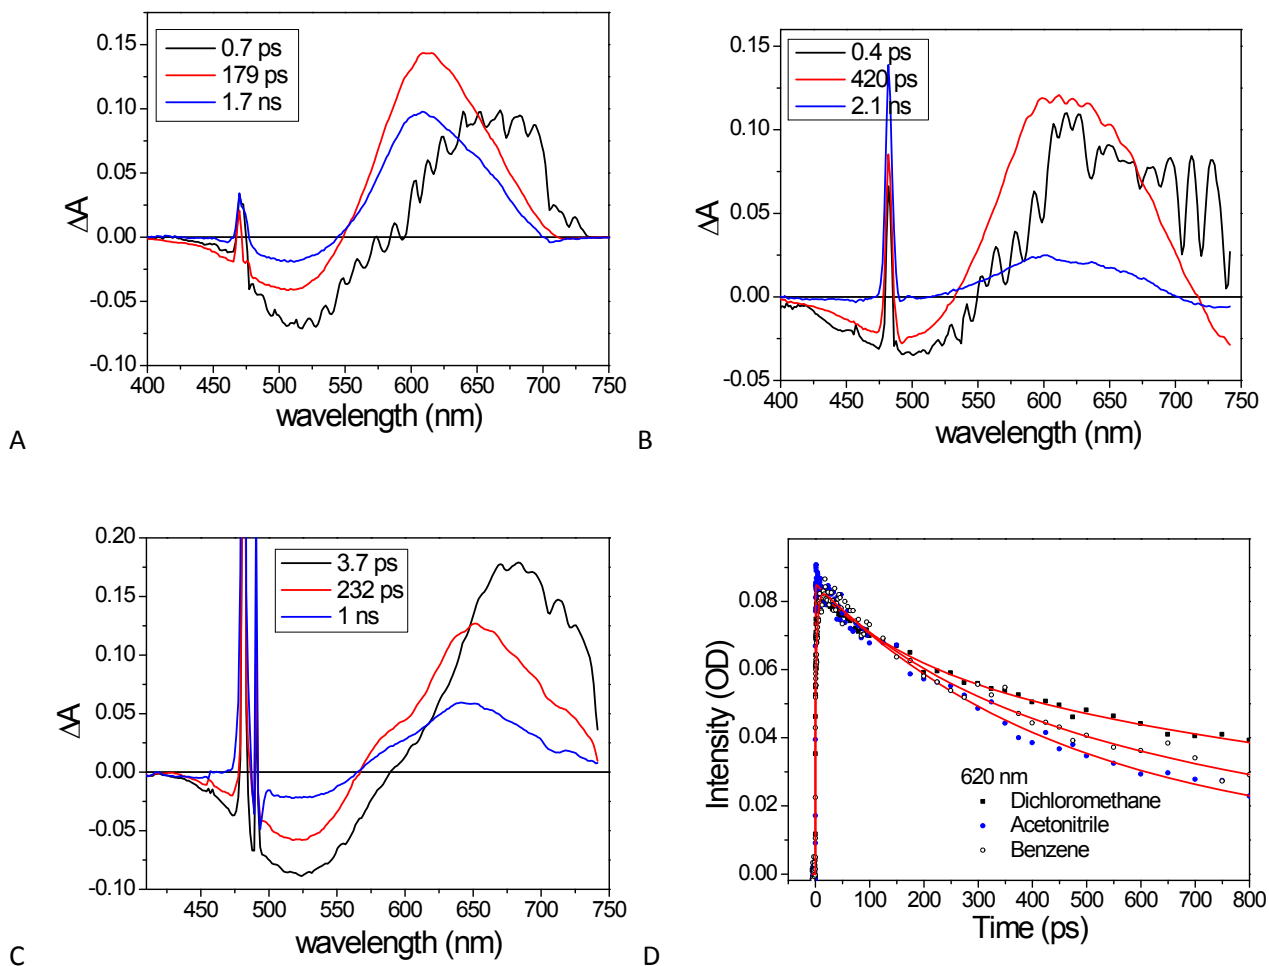

**Figure S10:** EADS obtained by the global analysis of transient data recorded for **MM56** in A) dichloromethane; B) acetonitrile; C) benzene. Panel D) reports the kinetic traces at 620 nm registered in the three solvents (scattered points) together with the fit resulting from global analysis (red line).



## Additional computational results

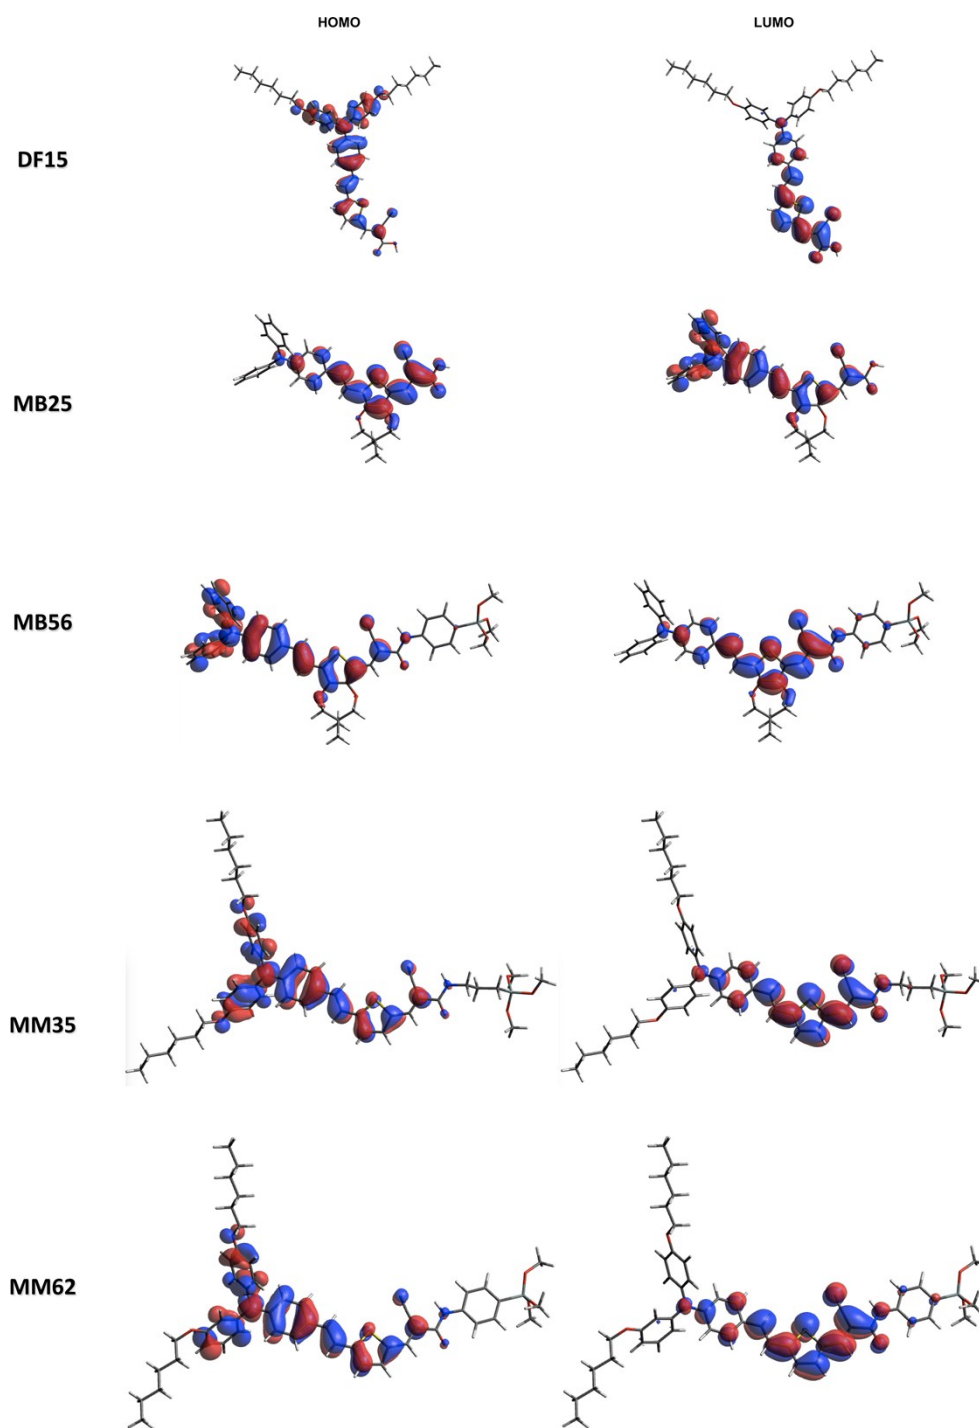

**Figure S11:** Wave function plots of the HOMO and LUMO orbitals of compounds **DF15**, **MB25**, **MB56**, **MM35** and **MM62**. Adapted from reference (M. Bessi et al., "Synthesis of Silatrane-Containing Organic Sensitizers as Precursors for Silyloxy Anchoring Group in Dye Sensitized Solar Cells", *Synthesis*, 2017, manuscript accepted for publication).

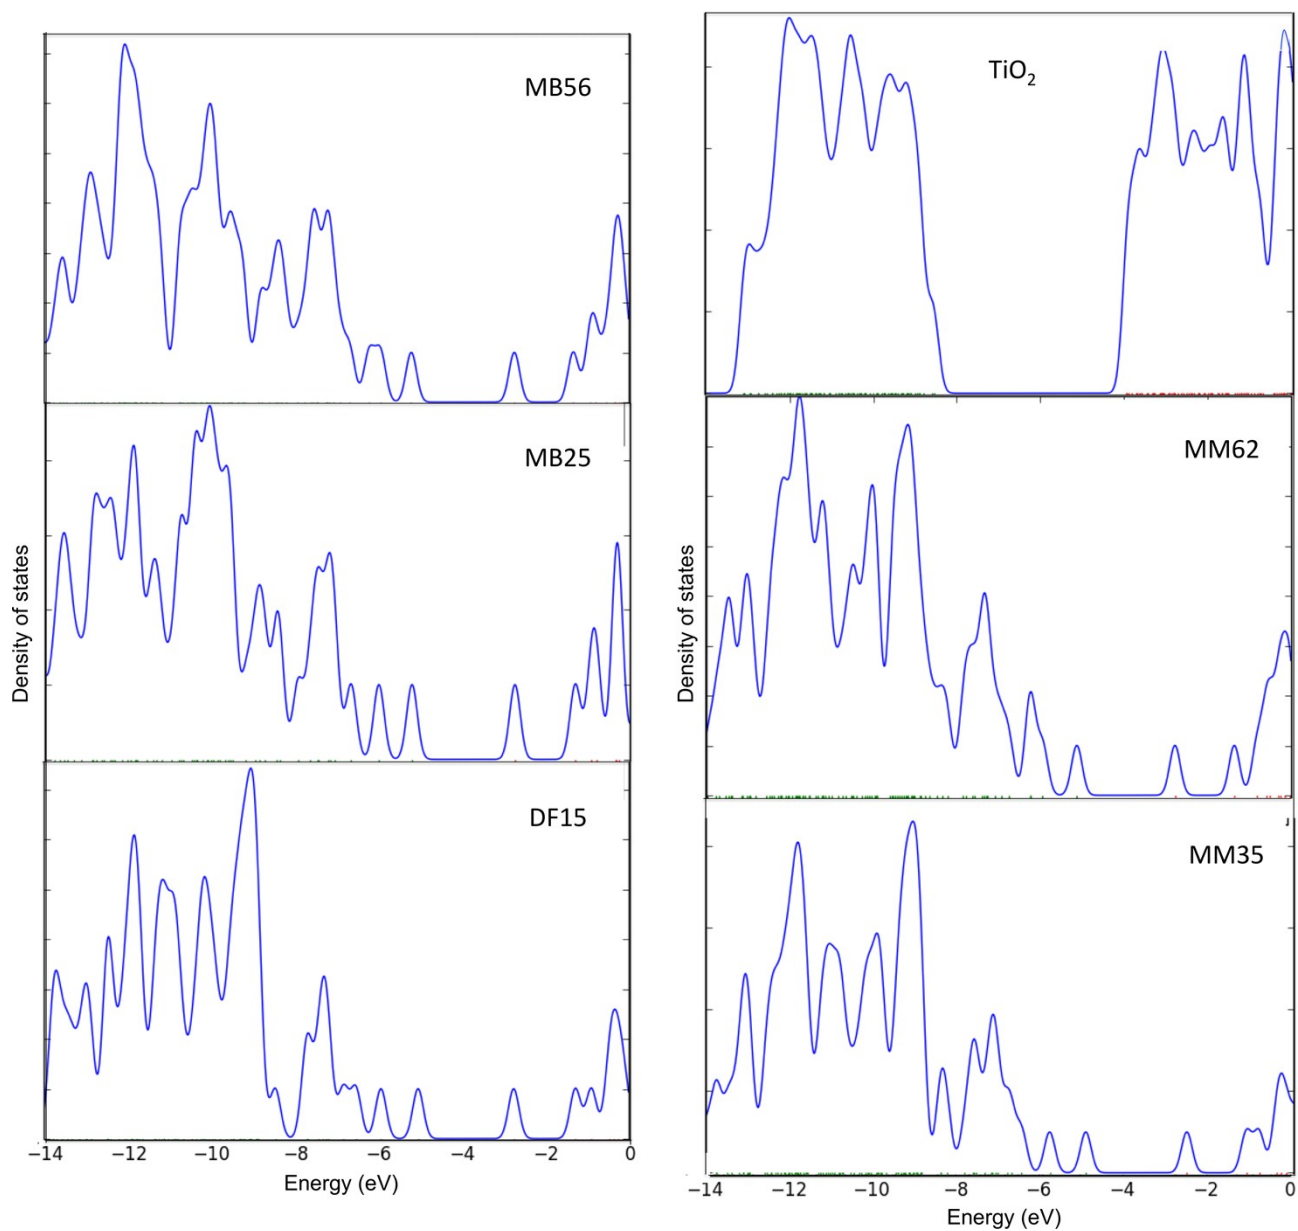

**Figure S12:** TDOS of isolated **DF15**, **MB25**, **MB56**, **MM35** and **MM62** dyes and bare  $(\text{TiO}_2)_{16}$ .

**Table S1**

TD-DFT (CAM-B3LYP/6-31G\* and, in brackets, MPW1K/6-31G\*) computed absorption maxima ( $\lambda_{\text{max}}^{\text{a}}$ ), energy ( $E_{\text{exc}}$ ), oscillator strengths (f) and composition in terms of molecular orbitals for the lowest singlet-singlet excitation of the deprotonated form of DF15 (DF15-deprot<sup>a</sup>) and for the  $S_2$ ,  $S_3$  and  $S_4$  states (which are shown along with the lowest singlet-singlet excitation,  $S_1$ ) of MB25 and MB56 in  $\text{CH}_2\text{Cl}_2$ ,  $\text{C}_6\text{H}_6$  and  $\text{CH}_3\text{CN}$ :

| Dye         |                          | $\lambda_{\text{max}}^{\text{a}}$ (nm) | $E_{\text{exc}}$ (eV)               | f                                     | Transitions                              |
|-------------|--------------------------|----------------------------------------|-------------------------------------|---------------------------------------|------------------------------------------|
| DF15-deprot | $\text{CH}_2\text{Cl}_2$ | 420 (434)                              | 2.95 (2.83)                         | 1.561 (1.509)                         | H->L 74% (86%)                           |
|             | $\text{C}_6\text{H}_6$   | 411 (423)                              | 3.01 (2.93)                         | 1.600 (1.630)                         | H->L 86% (92%)                           |
|             | $\text{CH}_3\text{CN}$   | 423 (444)                              | 2.93 (2.80)                         | 1.530 (1.447)                         | H->L 73% (86%)                           |
| MB25        | $\text{CH}_2\text{Cl}_2$ | 477 (497) ( $S_1$ )                    | 2.60 (2.49) ( $S_1$ )               | 1.505 (1.494) ( $S_1$ )               | H->L 80% (91%) ( $S_1$ )                 |
|             |                          | 338 (356) ( $S_2$ )                    | 3.67 (3.48) ( $S_2$ )               | 0.178 (0.125) ( $S_2$ )               | H-1->L 71% (89%) ( $S_2$ )               |
|             |                          | 322 (320) ( $S_3$ )                    | 3.85 (3.87) ( $S_3$ )               | 0.103 (0.101) ( $S_3$ )               | H-2-> L 86% (86%) ( $S_3$ )              |
|             |                          | 290 (301) ( $S_4$ )                    | 4.28 (4.12) ( $S_4$ )               | 0.278 (0.381) ( $S_4$ )               | H->L+1 69% (87%) ( $S_4$ )               |
|             | $\text{C}_6\text{H}_6$   | 475 (493) ( $S_1$ )                    | 2.61 (2.51) ( $S_1$ )               | 1.519 (1.518) ( $S_1$ )               | H->L 80% (90%) ( $S_1$ )                 |
|             |                          | 336 (353) ( $S_2$ )                    | 3.69 (3.51) ( $S_2$ )               | 0.196 (0.122) ( $S_2$ )               | H-1->L 70% (89%) ( $S_2$ )               |
|             |                          | 319 (317) ( $S_3$ )                    | 3.89 (3.91) ( $S_3$ )               | 0.099 (0.090) ( $S_3$ )               | H-2->L 85% (85%) ( $S_3$ )               |
|             |                          | 289 (300) ( $S_4$ )                    | 4.29 (4.13) ( $S_4$ )               | 0.259 (0.391) ( $S_4$ )               | H->L+1 66% (86%) ( $S_4$ )               |
|             | $\text{CH}_3\text{CN}$   | 476 (496) ( $S_1$ )                    | 2.61 (2.50) ( $S_1$ )               | 1.491 (1.475) ( $S_1$ )               | H->L 80% (91%) ( $S_1$ )                 |
|             |                          | 338 (356) ( $S_2$ )                    | 3.67 (3.48) ( $S_2$ )               | 0.168 (0.127) ( $S_2$ )               | H-1->L 71% (90%) ( $S_2$ )               |
|             |                          | 323 (321) ( $S_3$ )                    | 3.84 (3.86) ( $S_3$ )               | 0.101 (0.101) ( $S_3$ )               | H-2->L 86% (87%) ( $S_3$ )               |
|             |                          | 290 (301) ( $S_4$ )                    | 4.28 (4.12) ( $S_4$ )               | 0.279 (0.372) ( $S_4$ )               | H->L+1 70% (87%) ( $S_4$ )               |
| MB56        | $\text{CH}_2\text{Cl}_2$ | 479 (499) ( $S_1$ )                    | 2.59 (2.48) ( $S_1$ )               | 1.733 (1.721) ( $S_1$ )               | H->L 80% (90%) ( $S_1$ )                 |
|             |                          | 339 (358) ( $S_2$ )                    | 3.66 (3.47) ( $S_2$ )               | 0.271 (0.230) ( $S_2$ )               | H-1->L 70% (89%) ( $S_2$ )               |
|             |                          | 320 (319) ( $S_3$ )                    | 3.88 (3.89) ( $S_3$ )               | 0.103 (0.122) ( $S_3$ )               | H-3->L 82% (76%) ( $S_3$ )               |
|             |                          | 291 (302 <sup>s</sup> ) ( $S_4$ )      | 4.27 (4.10 <sup>s</sup> ) ( $S_4$ ) | 0.286 (0.378 <sup>s</sup> ) ( $S_4$ ) | H->L+1 62% (80% <sup>s</sup> ) ( $S_4$ ) |

|  |                                   |                                                            |                                                             |                                                               |                                                                  |
|--|-----------------------------------|------------------------------------------------------------|-------------------------------------------------------------|---------------------------------------------------------------|------------------------------------------------------------------|
|  | <b>C<sub>6</sub>H<sub>6</sub></b> | 477 (495) (S <sub>1</sub> )                                | 2.60 (2.50) (S <sub>1</sub> )                               | 1.741 (1.741) (S <sub>1</sub> )                               | H->L 80% (90%) (S <sub>1</sub> )                                 |
|  |                                   | 338 (356) (S <sub>2</sub> )                                | 3.67 (3.49) (S <sub>2</sub> )                               | 0.285 (0.231) (S <sub>2</sub> )                               | H-1->L 70% (89%) (S <sub>2</sub> )                               |
|  |                                   | 317 (316) (S <sub>3</sub> )                                | 3.91 (3.92) (S <sub>3</sub> )                               | 0.101 (0.131) (S <sub>3</sub> )                               | H-3->L 82% (58%)(S <sub>3</sub> )                                |
|  |                                   | 289 <sup>&amp;</sup> (302 <sup>§</sup> ) (S <sub>5</sub> ) | 4.28 <sup>&amp;</sup> (4.11 <sup>§</sup> )(S <sub>5</sub> ) | 0.236 <sup>&amp;</sup> (0.394 <sup>§</sup> )(S <sub>5</sub> ) | H->L+1 61% <sup>&amp;</sup> (81% <sup>§</sup> )(S <sub>5</sub> ) |
|  | <b>CH<sub>3</sub>CN</b>           | 478 (498) (S <sub>1</sub> )                                | 2.60 (2.49) (S <sub>1</sub> )                               | 1.728 (1.710) (S <sub>1</sub> )                               | H->L 80% (90%) (S <sub>1</sub> )                                 |
|  |                                   | 338 (358) (S <sub>2</sub> )                                | 3.66 (3.47) (S <sub>2</sub> )                               | 0.263 (0.231) (S <sub>2</sub> )                               | H-1->L 70% (89%) (S <sub>2</sub> )                               |
|  |                                   | 320 (319) (S <sub>3</sub> )                                | 3.87 (3.89) (S <sub>3</sub> )                               | 0.100 (0.119) (S <sub>3</sub> )                               | H-3->L 82% (77%)(S <sub>3</sub> )                                |
|  |                                   | 290 (302 <sup>§</sup> )(S <sub>4</sub> )                   | 4.27 (4.10 <sup>§</sup> )(S <sub>4</sub> )                  | 0.280 (0.364 <sup>§</sup> )(S <sub>4</sub> )                  | H->L+1 65% (86% <sup>§</sup> )(S <sub>4</sub> )                  |

<sup>a</sup>DF15-deprot corresponds to the DF15 molecule in which the cyanoacrylic acid anchoring group is deprotonated; <sup>§</sup>These values correspond to the computed S<sub>5</sub> state (the computed S<sub>4</sub> state has a negligible value for the oscillator strength); <sup>&</sup>These values correspond to the computed S<sub>5</sub> state (the computed S<sub>4</sub> state has a lower value for the oscillator strength).

**Table S2**

TD-DFT (CAM-B3LYP/6-311+G(2d,p)) computed absorption maxima ( $\lambda_{\text{max}}^{\text{a}}$ ), excitation energy ( $E_{\text{exc}}$ ), oscillator strengths (f) and composition in terms of molecular orbitals for the lowest singlet-singlet excitation of DF15 and of the deprotonated form of DF15 (DF15-deprot<sup>a</sup>) in CH<sub>2</sub>Cl<sub>2</sub>, C<sub>6</sub>H<sub>6</sub> and CH<sub>3</sub>CN:

| Dye                      |                                 | $\lambda_{\text{max}}^{\text{a}}$ (nm) | $E_{\text{exc}}$ (eV) | f      | Transition<br>H→L |
|--------------------------|---------------------------------|----------------------------------------|-----------------------|--------|-------------------|
| DF15                     | CH <sub>2</sub> Cl <sub>2</sub> | 508.97                                 | 2.4360                | 1.5944 | 77%               |
|                          | C <sub>6</sub> H <sub>6</sub>   | 506.64                                 | 2.4472                | 1.6050 | 77%               |
|                          | CH <sub>3</sub> CN              | 506.75                                 | 2.4467                | 1.5829 | 77%               |
| DF15-deprot <sup>a</sup> | CH <sub>2</sub> Cl <sub>2</sub> | 439.42                                 | 2.8215                | 1.5348 | 73%               |
|                          | C <sub>6</sub> H <sub>6</sub>   | 428.20                                 | 2.8955                | 1.5707 | 83%               |
|                          | CH <sub>3</sub> CN              | 443.24                                 | 2.7972                | 1.5065 | 72%               |

<sup>a</sup>DF15-deprot corresponds to the DF15 molecule in which the cyanoacrylic acid anchoring group is deprotonated.

**Table S3**

*In vacuo* FMOs energies of DF15, MB25, MB56, MM35 and MM62 at the B3LYP/6-31G\* level:

| Dye  | Energy (eV) |             |             |             |                      |
|------|-------------|-------------|-------------|-------------|----------------------|
|      | HOMO-1      | HOMO        | LUMO        | LUMO+1      | $\Delta(\text{H-L})$ |
| DF15 | -5.68649164 | -4.79720348 | -2.52962752 | -1.02344332 | -2.26757596          |
| MB25 | -5.76268524 | -4.96836696 | -2.5198312  | -1.04303596 | -2.44853576          |
| MB56 | -5.70145824 | -4.96591788 | -2.51357244 | -1.07106432 | -2.45234544          |
| MM35 | -5.56784732 | -4.70794812 | -2.32771448 | -0.87867548 | -2.38023364          |
| MM62 | -5.70581216 | -4.88945216 | -2.56037708 | -1.10643992 | -2.32907508          |

**Table S4**

FMOs energies of DF15, MB25, MB56, MM35 and MM62 on TiO<sub>2</sub> and *in vacuo* at the B3LYP/6-311G(d,p) level (the standard LANL2DZ basis set was used for the Ti atom):

| Dye         |                  | Energy (eV) |             |             |             |             |
|-------------|------------------|-------------|-------------|-------------|-------------|-------------|
|             |                  | HOMO        | LUMO        | LUMO+8      | LUMO+12     | Δ(H-L)      |
| <b>DF15</b> | TiO <sub>2</sub> | -5.44348848 | -3.53864848 |             |             | -1.90484000 |
|             | <i>in vacuo</i>  | -5.03802968 | -2.74922836 |             |             | -2.28880132 |
| <b>MB25</b> | TiO <sub>2</sub> | -5.49709612 | -3.48504084 |             |             | -2.01205528 |
|             | <i>in vacuo</i>  | -5.20728832 | -2.74460232 |             |             | -2.46268600 |
| <b>MB56</b> | TiO <sub>2</sub> | -5.24674572 | -3.57293560 | -3.02651864 |             | -1.67381012 |
|             | <i>in vacuo</i>  | -5.20021320 | -2.73371752 |             |             | -2.46649568 |
| <b>MM35</b> | TiO <sub>2</sub> | -5.01898128 | -3.62518264 |             | -2.93889600 | -1.39379864 |
|             | <i>in vacuo</i>  | -4.94686948 | -2.54268928 |             |             | -2.4041802  |
| <b>MM62</b> | TiO <sub>2</sub> | -5.16483760 | -3.57266348 | -3.02352532 |             | -1.59217412 |
|             | <i>in vacuo</i>  | -5.12483596 | -2.77671248 |             |             | -2.34812348 |

## References

1. Kelly, S. M.; Lipshutz, B. H., *Org. Lett.* **2014**, *16*, 98-101.
